# Supplementary material for: The first amphiphilic graft copolymer bearing a hydrophilic poly(2-hydroxylethyl acrylate) backbone synthesized by successive RAFT and ATRP
Source: Royal Society of Chemistry journal article supplement (doi:10.1039/c4py00415a), 2014-01-01
Supplement: c4py00415a1.pdf [file c4py00415a1.pdf]

## Supporting Information for

### “First Amphiphilic Graft Copolymer Bearing Hydrophilic Poly(2-hydroxyethyl acrylate) Backbone Synthesized by Successive RAFT and ATRP”

*Xiuyu Jiang, Xue Jiang, Guolin Lu,\* Chun Feng, Xiaoyu Huang\**

Laboratory of Synthetic and Self-Assembly Chemistry for Organic Functional Molecules, Shanghai Institute of Organic Chemistry, Chinese Academy of Sciences, 345 Lingling Road, Shanghai 200032, P. R. China

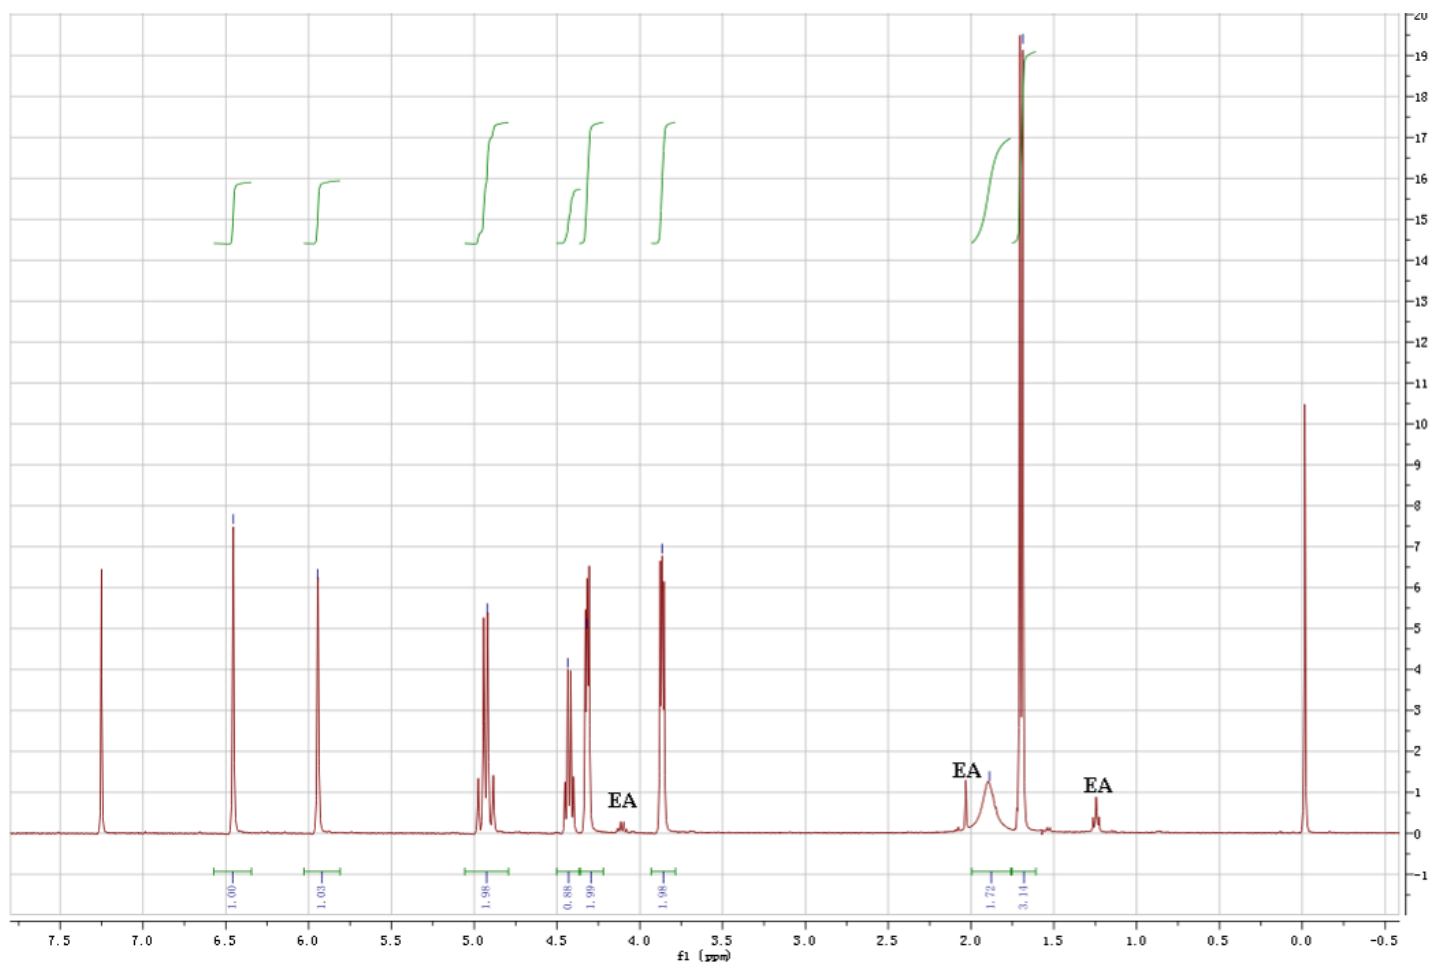

**Figure S1.**  $^1\text{H}$  NMR spectrum of HECPMA monomer with integration area in  $\text{CDCl}_3$ .

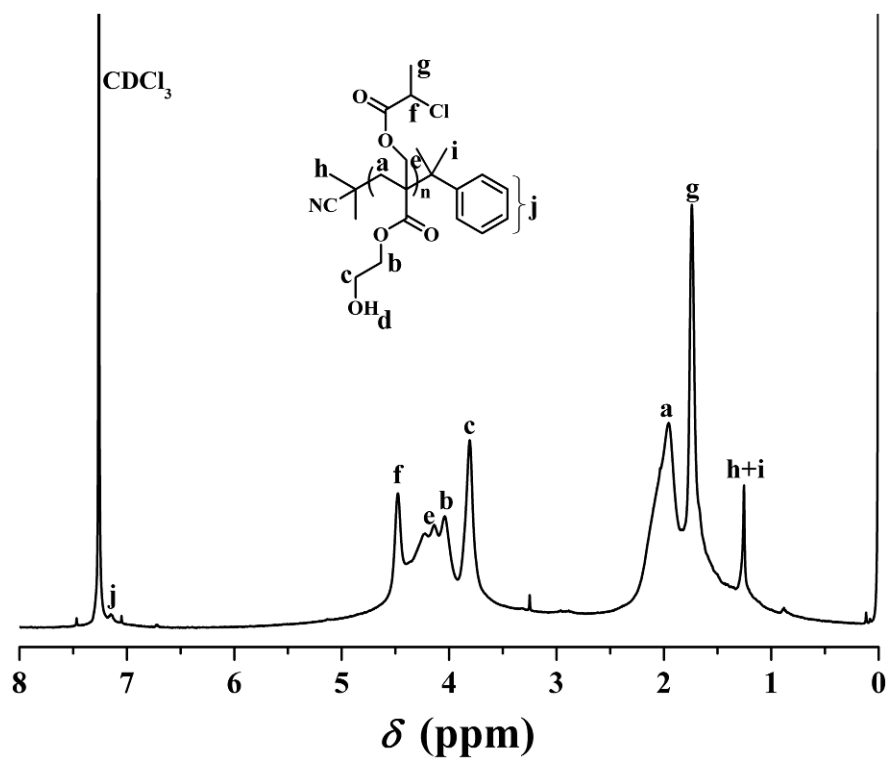

**Figure S2.**  $^1\text{H}$  NMR spectrum of PHECPMA **5** in  $\text{CDCl}_3$ .

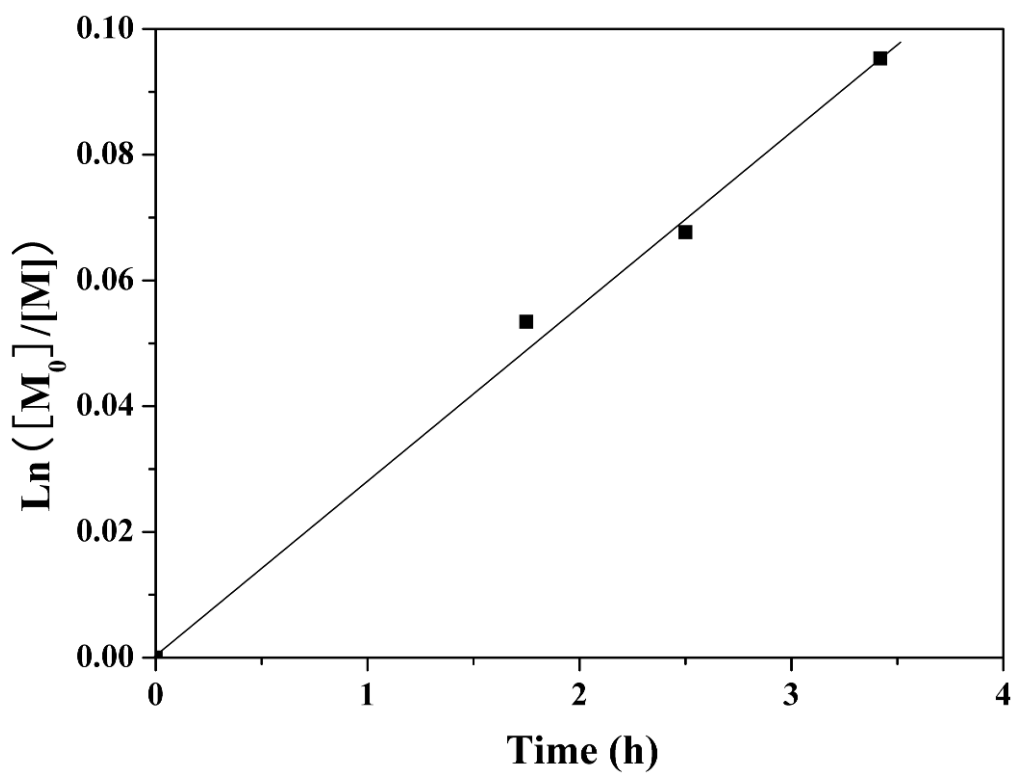

**Figure S3.** Kinetic plot for ATRP graft copolymerization of styrene initiated by PHECPMA **5** at  $80^\circ\text{C}$ ,  $[\text{St}]:[\text{Cl group}]:[\text{CuCl}]:[\text{PMDETA}] = 800:1:1:1$ .
